# Supplementary material for: Identification of three bacterial species associated with increased appendicular lean mass: the HUNT study
Source: PubMed Central journal article supplement (PMC10119287; doi:10.1038/s41467-023-37978-9), 2023-04-20
Supplement: 41467_2023_37978_MOESM2_ESM.pdf [file 41467_2023_37978_MOESM2_ESM.pdf]

## **Description of Additional Supplementary Files**

File Name: Supplementary Data 1

Description: Estimated causal effects from the individual genetic variants for appendicular lean mass on the anabolic species count as well as combined effects from several different Mendelian randomization methods: inverse variance weighted (IVW), weighted median, penalized median, and Egger regression.
